# Supplementary material for: Catalytic dehydration ofd-xylose to furfural over a tantalum-based catalyst in batch and continuous process
Source: Royal Society of Chemistry journal article supplement (doi:10.1039/c5ra11411j), 2015-01-01
Supplement: c5ra11411j1.pdf [file c5ra11411j1.pdf]

Supplemental information

## **Catalytic dehydration of D-xylose to furfural over a tantalum-based catalyst in batch and continuous process**

Xing-Long Li<sup>§ a</sup>, Tao Pan<sup>§ b</sup>, Jin Deng<sup>b</sup>, Yao Fu\*<sup>b</sup> and Hua-Jian Xu\*<sup>a</sup>

<sup>a</sup> *School of Medical Engineering, and Key Laboratory of Advanced Functional Materials and Devices, Hefei University of Technology, Hefei 230009, China.*

<sup>b</sup> *University of Science and Technology of China, Hefei 230026, China.*

§ : *These authors contributed to the work equally and should be regarded as co-first authors.*

\*<sup>a</sup> **Corresponding author: Hua-Jian Xu**

E-mail: [hjxu@hfut.edu.cn](mailto:hjxu@hfut.edu.cn) Fax: (+86)-551-62904405

\*<sup>b</sup> **Corresponding author: Yao Fu**

E-mail: [fuyao@ustc.edu.cn](mailto:fuyao@ustc.edu.cn) Fax: (+86)-551-63606689

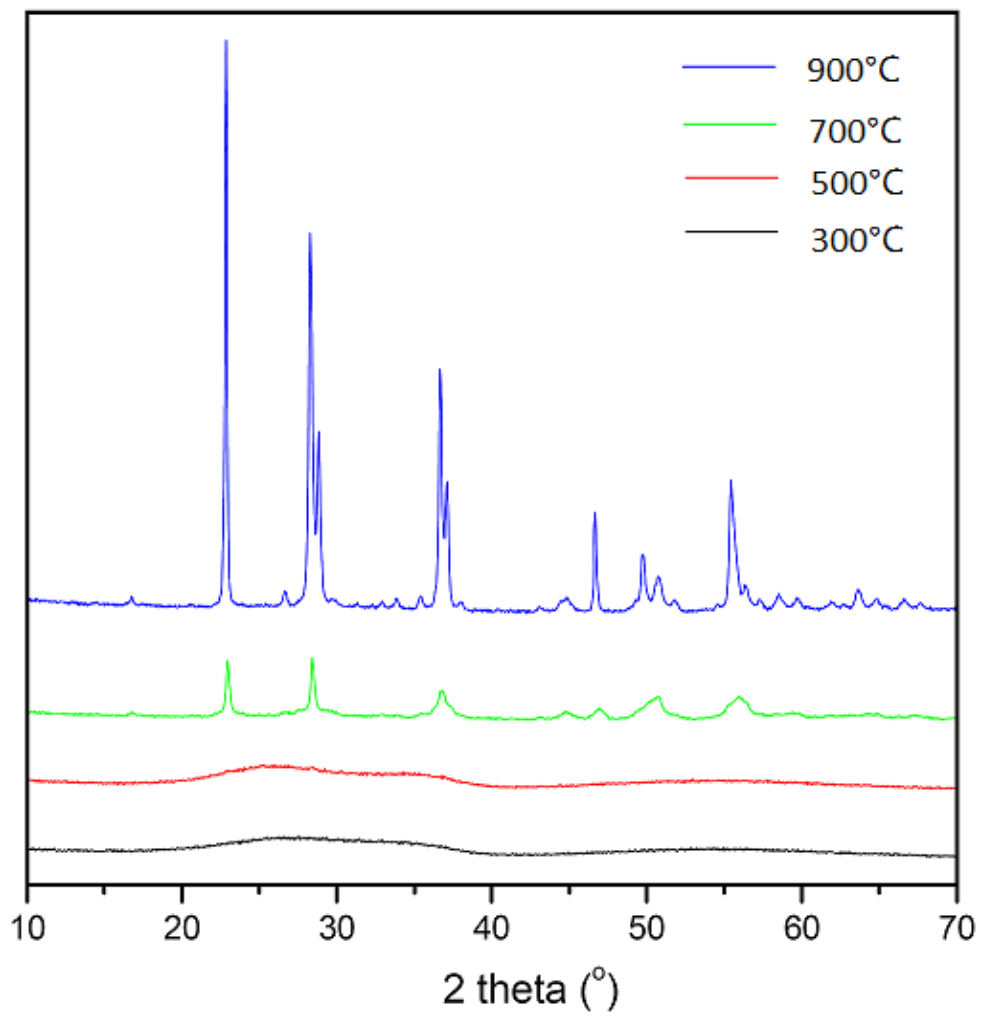

**Fig S1.** XRD patterns of the TA-p catalyst at different calcination temperature

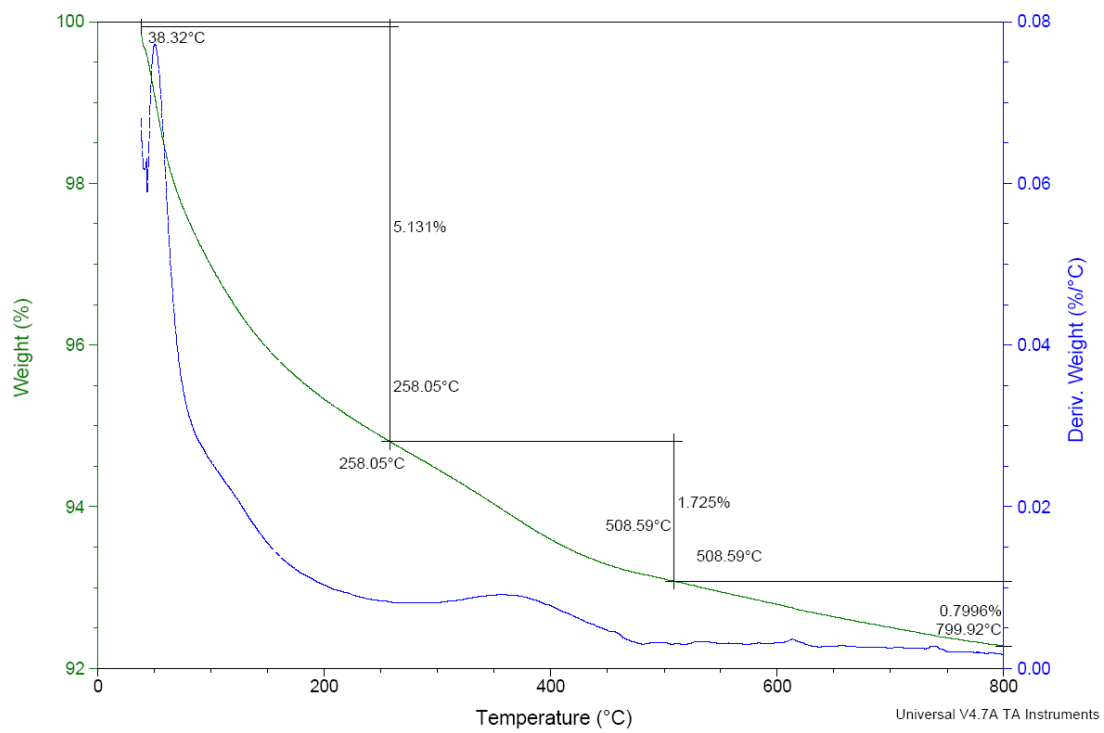

**Fig S2.** TG-DSC curve of the TA-p-300 catalyst

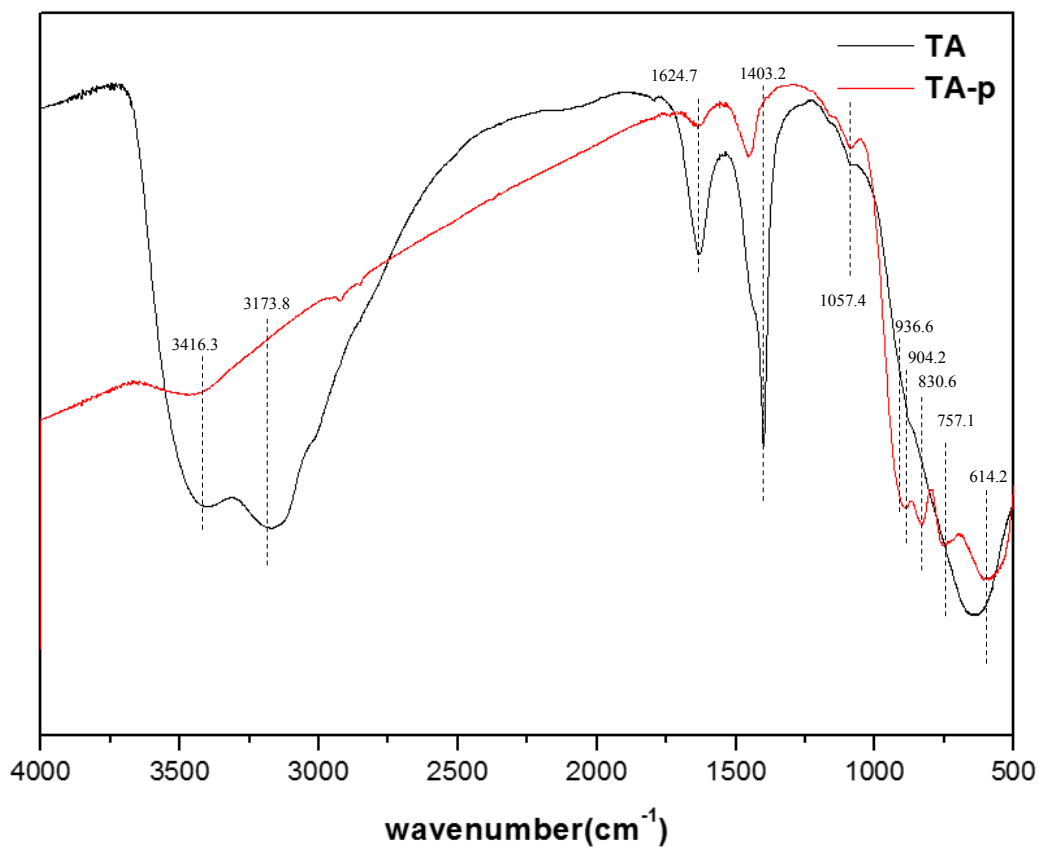

**Fig S3.** FTIR spectra of the TA and TA-p-300 catalyst

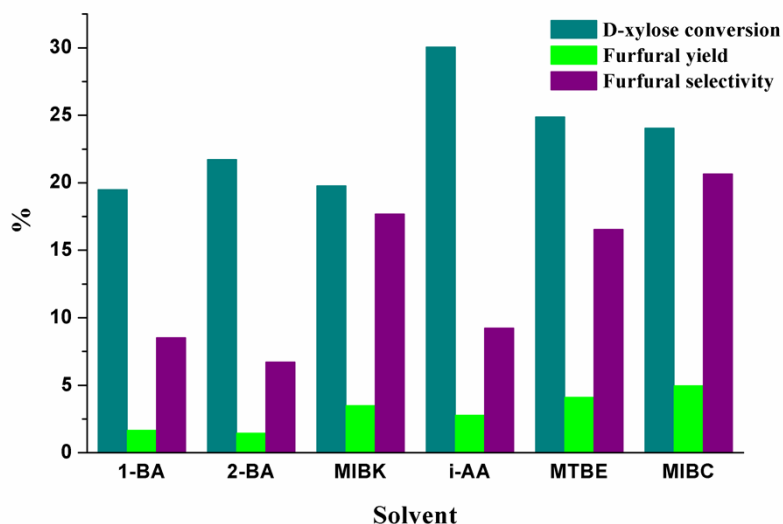

**Fig. S4.** The blank experiments without catalysts in six different organic solvents. Conversion of D-xylose and yield of furfural were calculated by HPLC. Reaction conditions: 0.4 g of D-xylose, 400 mg of catalyst, 4 mL of water and 6 mL of organic solvent, 160 °C, 3 h.

**Table S1.** The effect of NaCl on the BET surface area and the acid density of catalyst.<sup>a</sup>

| Entry          | Catalyst | BET /m <sup>2</sup> ·g <sup>-1</sup> | Acid density /mmol·g <sup>-1</sup> |
|----------------|----------|--------------------------------------|------------------------------------|
| 1 <sup>b</sup> | TA-p-300 | 139.6                                | 1.6                                |
| 2 <sup>c</sup> | TA-p-300 | 132.5                                | 1.5                                |
| 3 <sup>d</sup> | TA-p-300 | 120.3                                | 1.2                                |

<sup>a</sup> Acid density was measured by NH<sub>3</sub>-TPD.

<sup>b</sup> The catalyst was freshly prepared.

<sup>c</sup> The catalyst was collected and dried at 110 °C after reaction without adding of NaCl. Reaction condition: 0.4 g of D-xylose, 400 mg of catalyst, 4 mL of water and 6 mL of MIBC, 160 °C, 3 h.

<sup>d</sup> The catalyst was collected and dried at 110 °C after reaction with adding of NaCl. Reaction condition: 0.4 g of D-xylose, 0.4 g of NaCl, 400 mg of catalyst, 4 mL of water and 6 mL of MIBC, 160 °C, 3 h.

**Table S2.** The effect of single-phase solvent system on the conversion of D-xylose to furfural.

| Entry | Catalyst | Solvent   | Conversion of D-xylose (%) | Yield of furfural (%) |
|-------|----------|-----------|----------------------------|-----------------------|
| 1     | TA-p-300 | Water     | 80.2                       | 28.5                  |
| 2     | TA-p-300 | 1-butanol | 63.5                       | 16.7                  |

Reaction condition: 0.4 g of D-xylose, 400 mg of catalyst, 160 °C, 3 h.
